# Supplementary material for: A 2D cobalt based coordination polymer constructed from benzimidazole and acetate ion exhibiting spin-canted antiferromagnetism
Source: Royal Society of Chemistry journal article supplement (doi:10.1039/b924818h), 2010-01-01
Supplement: b924818h.pdf [file b924818h.pdf]

## Supporting Information

### A 2D Cobalt based coordination polymer constructed from benzimidazole and acetate ion exhibiting spin-canted antiferromagnetism

Leo Arai,<sup>a</sup> Muhammad Arif Nadeem,<sup>a</sup> Mohan Bhadbhade<sup>b</sup> and John Arron Stride\*<sup>a,c</sup>

<sup>a</sup> School of Chemistry, University of New South Wales, Sydney, NSW 2052, Australia. Fax: +61 (02) 9385 6141; Tel: +61 (0)2 9385 4675; E-mail: j.stride@unsw.edu.au

<sup>b</sup> Analytical Centre, University of New South Wales, Sydney, NSW 2052, Australia.

<sup>c</sup> Bragg Institute, Australian Nuclear Science and Technology Organisation, PMB 1, Menai, NSW 2234, Australia.

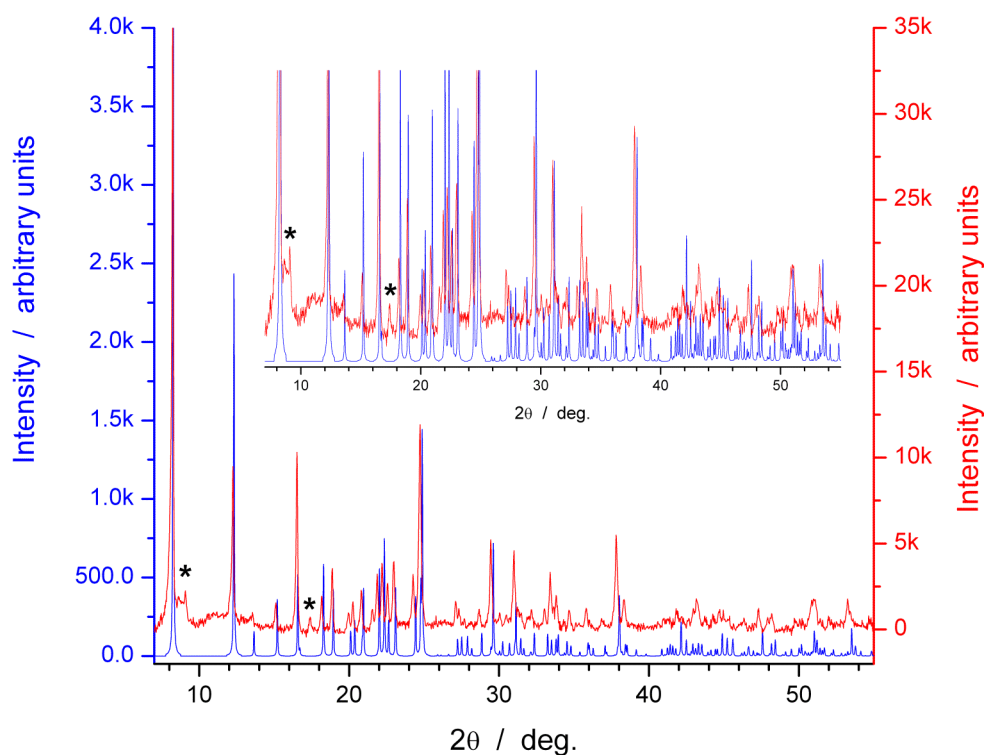

**S1.** Calculated and experimental powder XRD pattern of **1**. The highlighted peaks at 8° and 17.5° belong to a small amount of impurity present in the sample, estimated to ca. 1-2%.

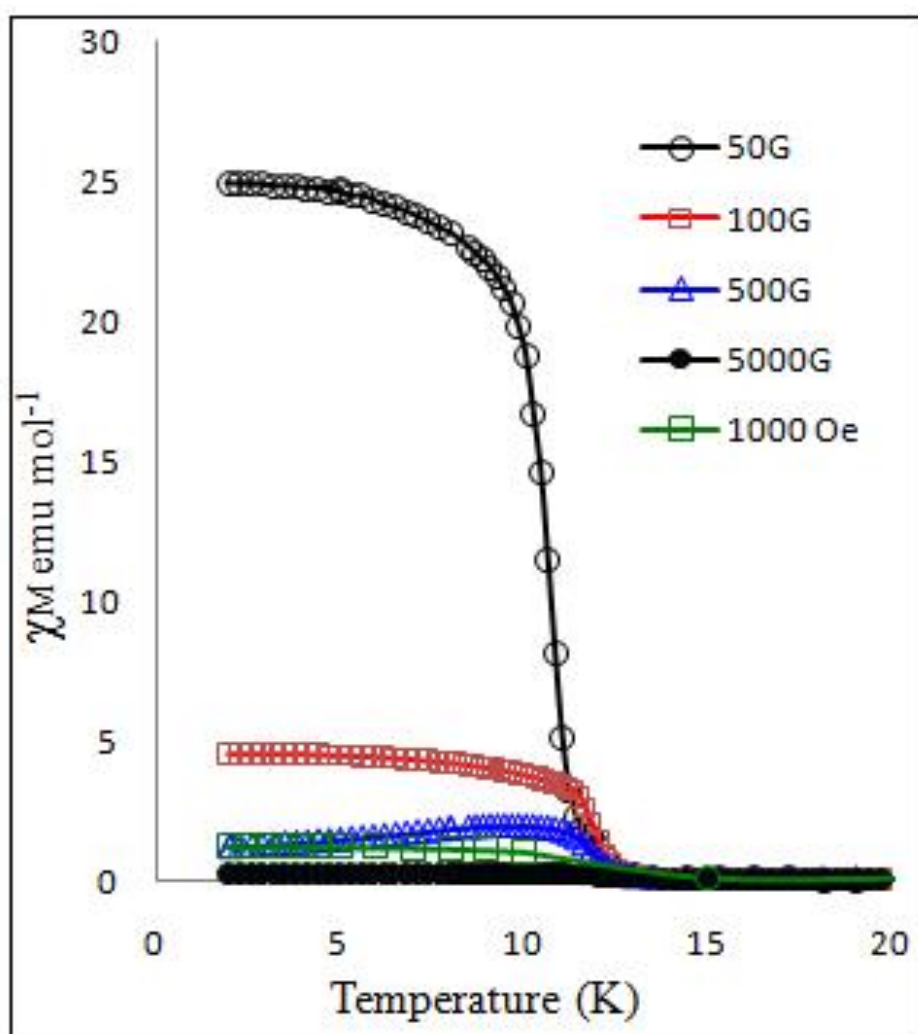

S2.  $\chi_M$  vs.  $T$  plot at various fields

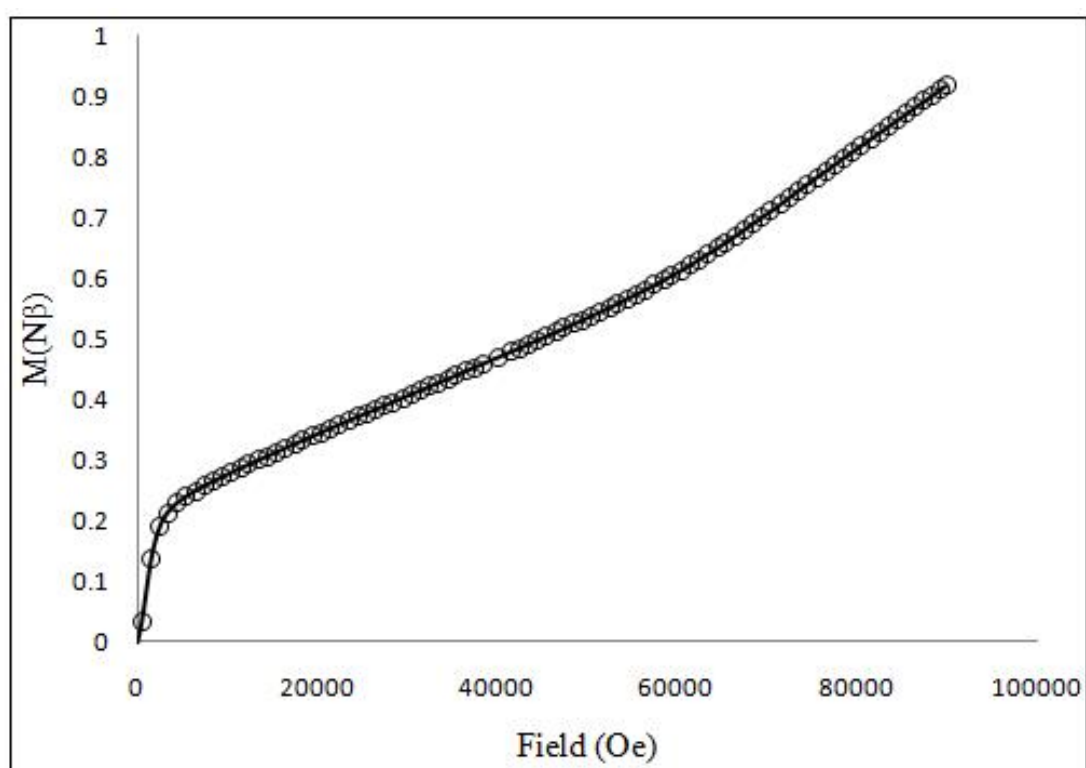

**S3.**  $M$  vs.  $H$  plot at  $T = 2$  K

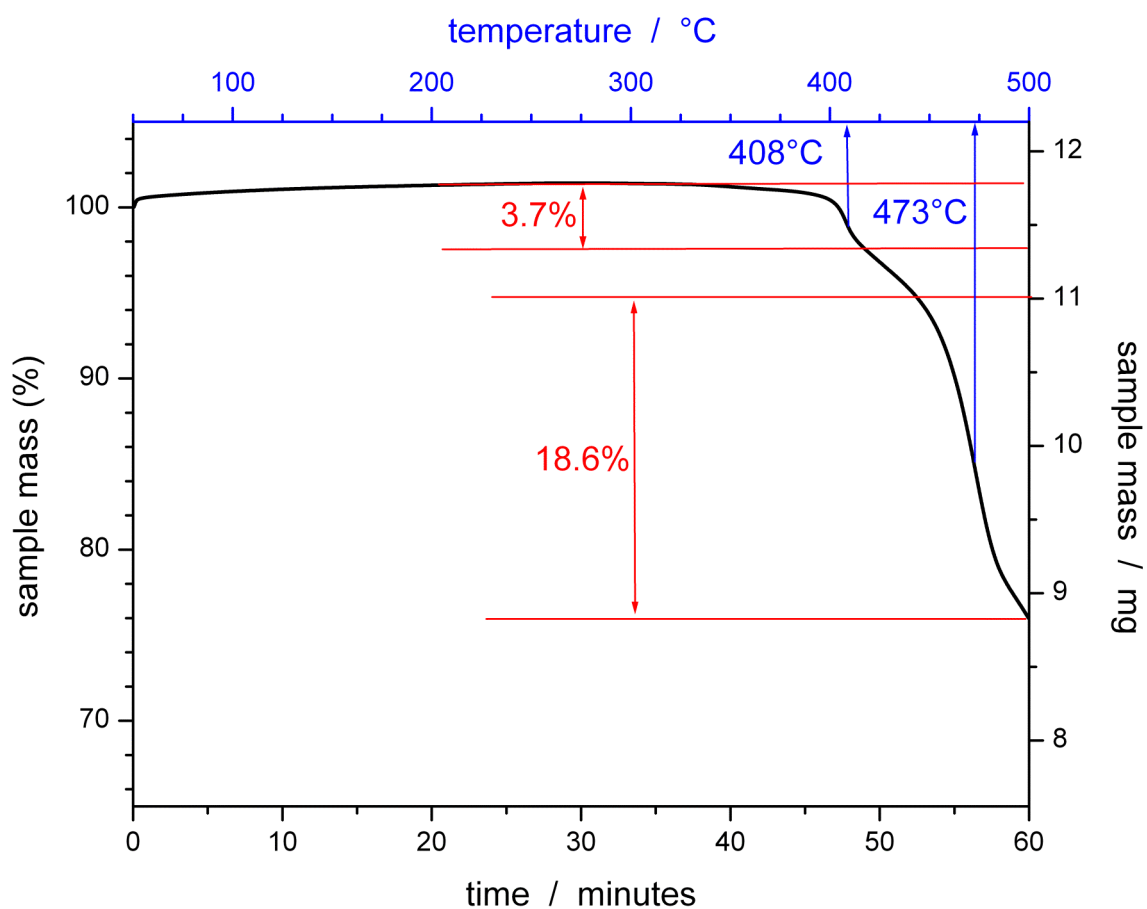

**S4.** TGA curve of **1**: two regions of sample decomposition are observed, the first at 408°C which represents a partial degassing of the sample and the second at 473°C which is consistent with the evolution of one molecule of CO<sub>2</sub> per formula unit.
